# Supplementary material for: Iron overload impairs normal hematopoietic stem and progenitor cells through reactive oxygen species and shortens survival in myelodysplastic syndrome mice
Source: PubMed Central journal article supplement — Haematologica. 2018 Jun 14;103(10):1627–34. doi: 10.3324/haematol.2018.193128 (PMC6165791; doi:10.3324/haematol.2018.193128), 2018-10
Supplement: 2018_193128-Disclosures_and_Contributions.pdf [file 2018_193128-Disclosures_and_Contributions.pdf]

Haematologica  
HAEMATOL/2018/193128  
Version 3

Iron overload impairs normal hematopoietic stem and progenitor cells  
through reactive oxygen species and shortens survival in  
myelodysplastic syndrome mice

Xin Jin, Xiaoyuan He, Xiaoli Cao, Ping Xu, Yi Xing, Songnan Sui,  
Luqiao Wang, Juanxia Meng, Wenyi Lu, Rui Cui, Hongyan Ni, and  
Mingfeng Zhao

Disclosures: none

Contributions: XJ, XYH designed the study and wrote the manuscript. PX, SNS, LQW, JXM collected the data. WYL, RC analyzed the data. XLC, YX provided clinical data. MFZ, HYN reviewed the manuscript and contributed to the final draft.
